# Supplementary material for: Microwave-Assisted Synthesis of 5-Substituted 3-Amino-1,2,4-triazoles from Aminoguanidine Bicarbonate and Carboxylic Acids
Source: MDPI journal article supplement (doi:10.3390/pr12030573), 2024-03-14
Supplement: s1 [file s1]

## Supplementary data

# Microwave-Assisted Synthesis of 5-Substituted 3-Amino-1,2,4-triazoles from Aminoguanidine Bicarbonate and Carboxylic Acids

Mustafa Kemal Gümüş<sup>1,\*</sup>, Mykola Yu. Gorobets<sup>2</sup>, Nesimi Uludag<sup>3</sup>

<sup>1</sup> Artvin Coruh University, Science-Technology Research and Application Center, Artvin, 08000, Türkiye; mkgumus@artvin.edu.tr

<sup>2</sup> SSI "Institute for Single Crystals", NAS of Ukraine, 60 Nauky Ave., Kharkiv, 61001, Ukraine; gorobets@isc.kh.ua

<sup>3</sup> Namık Kemal University, Faculty of Sciences and Arts, Department of Chemistry, Tekirdag, 59030, Türkiye; nuludag@nku.edu.tr

\* Correspondence: mkgumus@artvin.edu.tr

## NMR Spectra

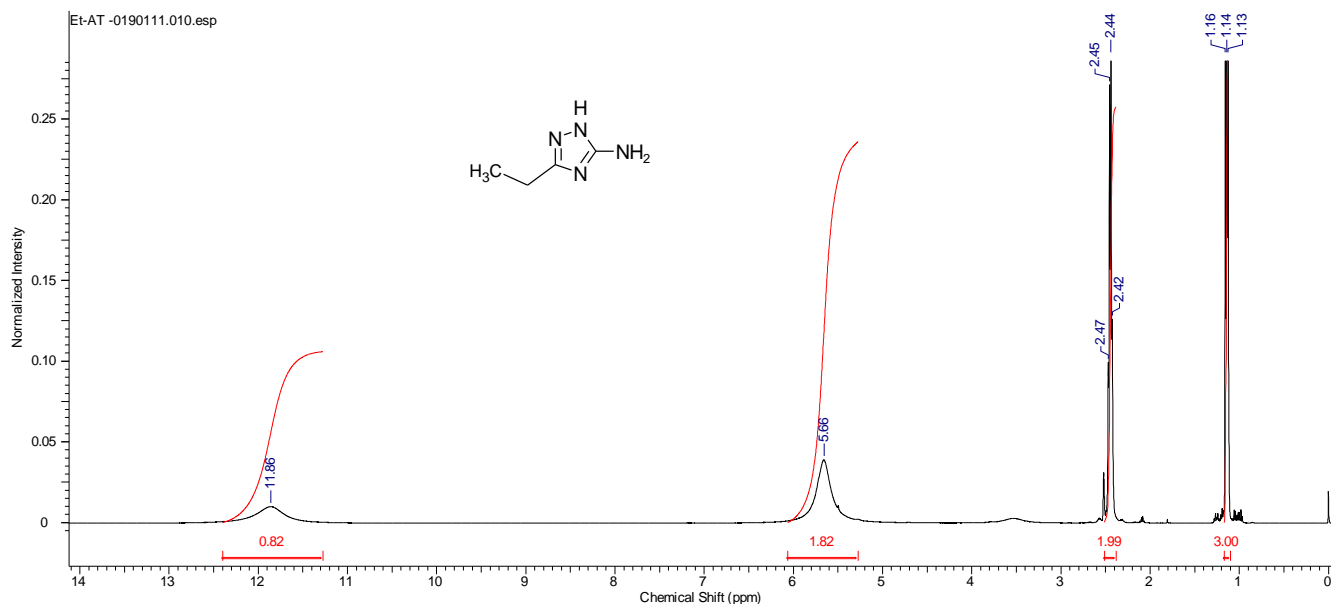

<sup>1</sup>H NMR Spectrum of compound **4a**. The spectrum shows the presence of one tautomer.

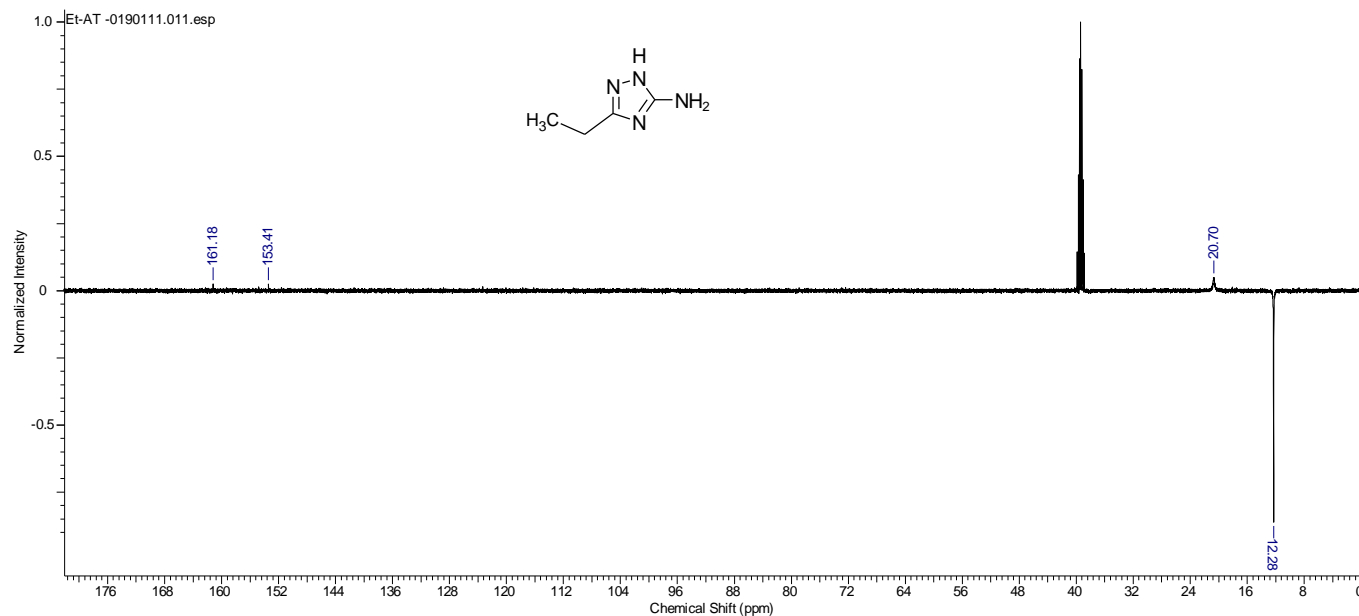

<sup>13</sup>C NMR Spectrum (APT) of compound **4a**.

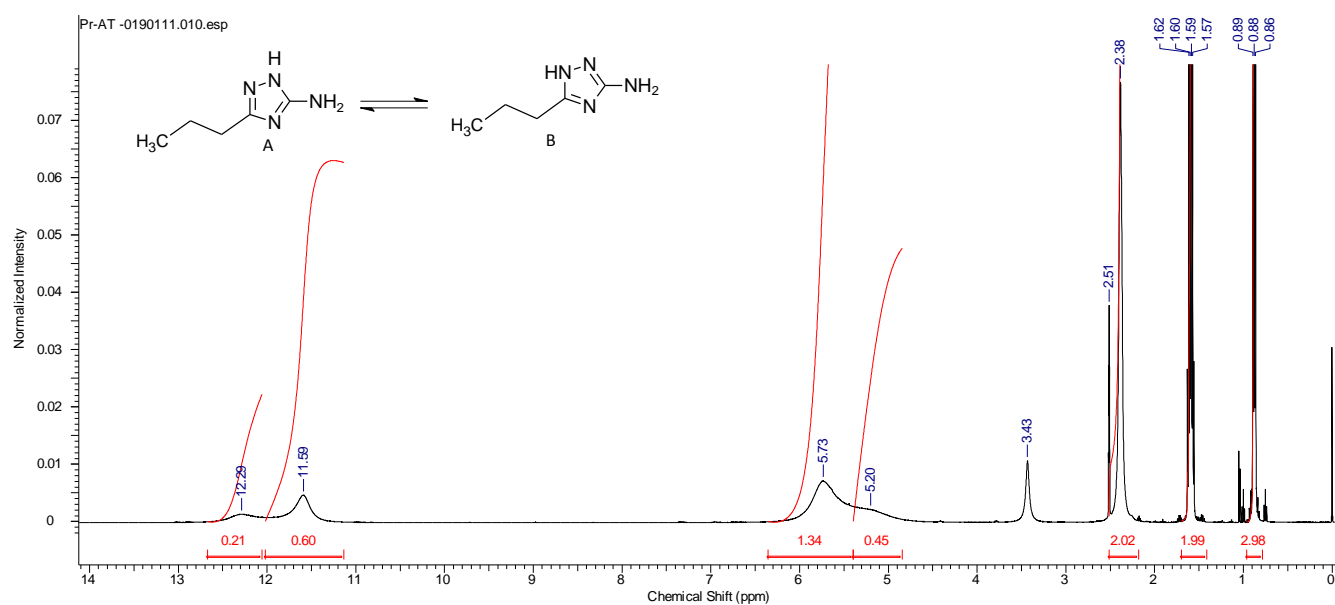

<sup>1</sup>H NMR Spectrum of compound **4b**. The spectrum shows the presence of two tautomers.

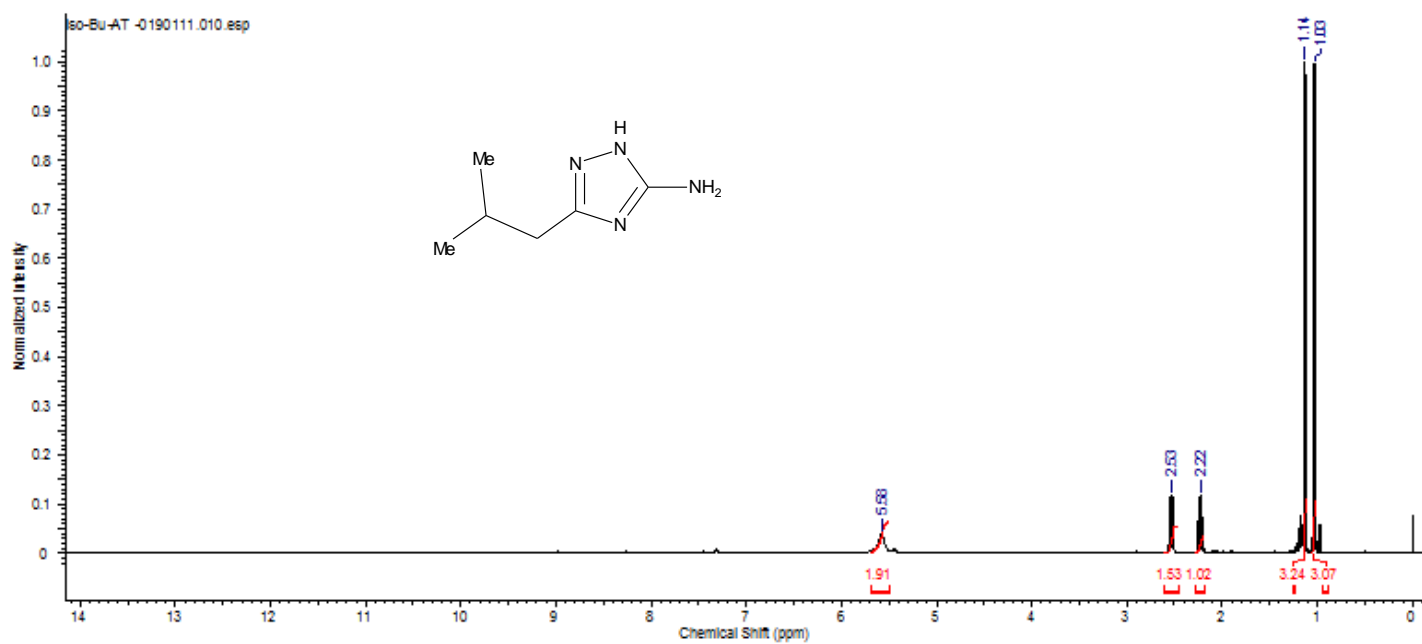

$^1\text{H}$  NMR Spectrum of compound **4d**.

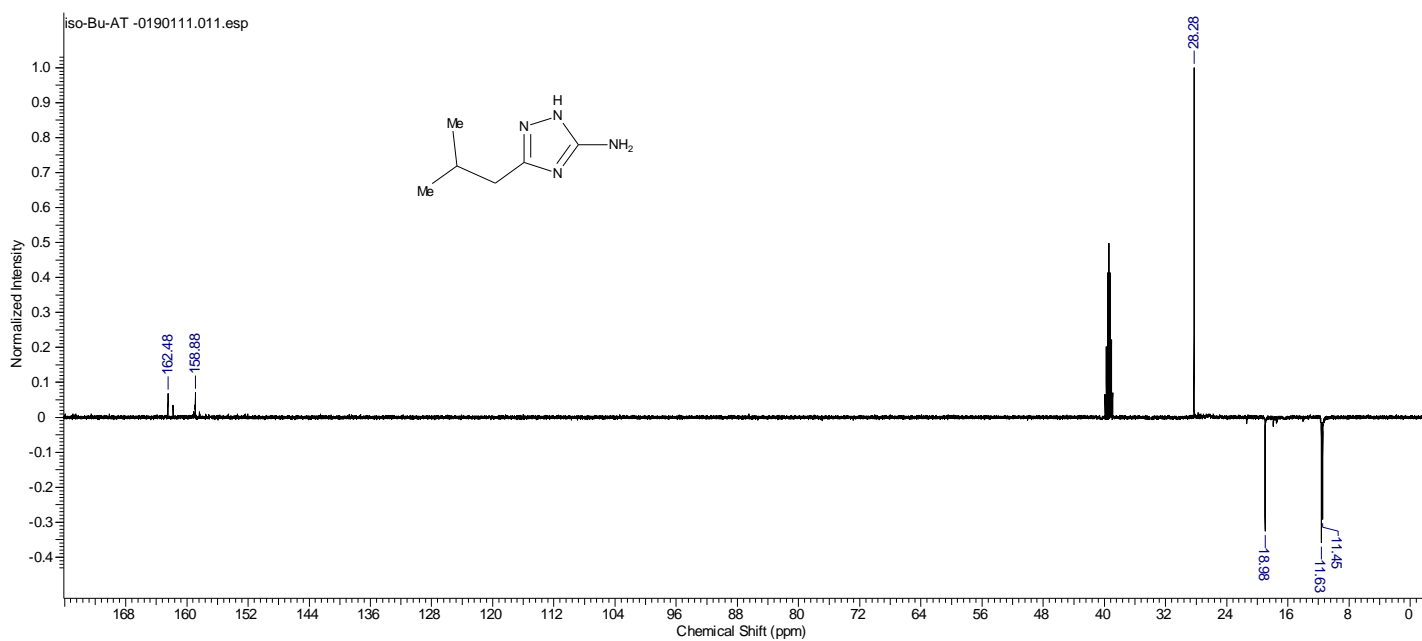

$^{13}\text{C}$  NMR Spectrum (APT) of compound **4d**.

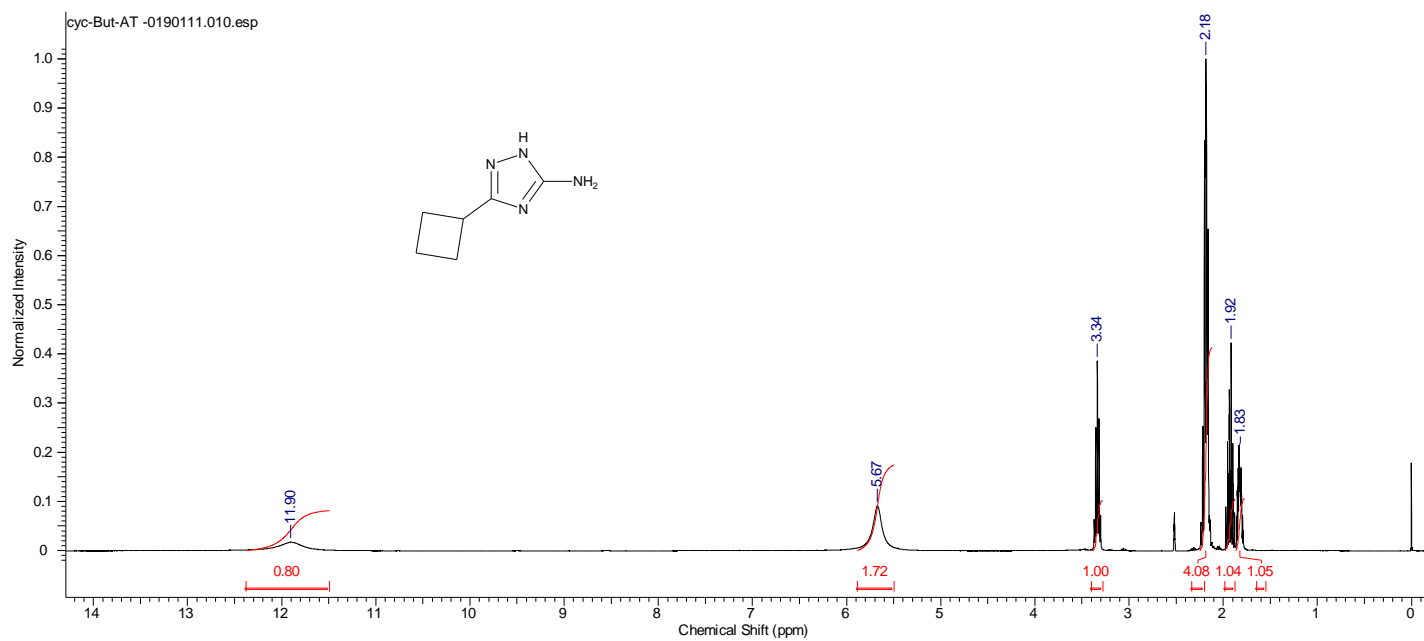

$^1\text{H}$  NMR Spectrum of compound **4f**.

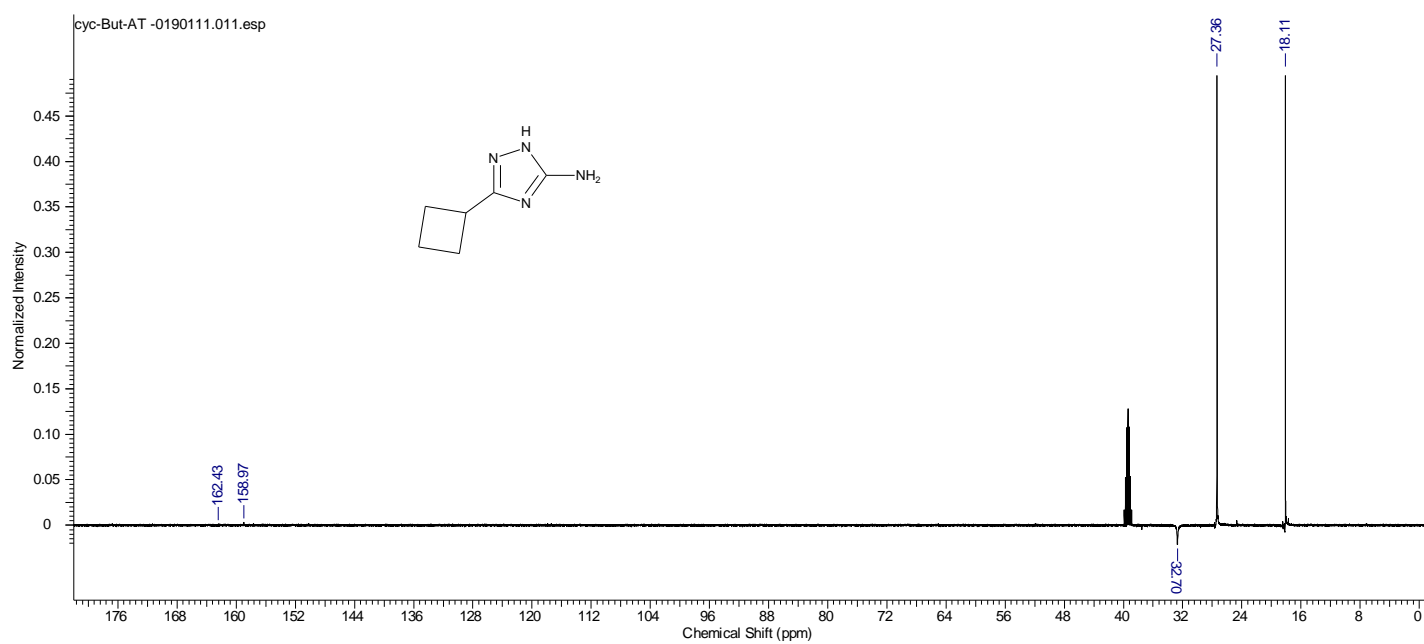

$^{13}\text{C}$  NMR Spectrum (APT) of compound **4f**.
